# Supplementary material
Source: PubMed Central journal article supplement (PMC2567143)
Supplement: 0807484105_0807484105SI.pdf [file 0807484105_0807484105SI.pdf]

# Supporting Information

Grégoire and Kmita 10.1073/pnas.0807484105

## SI Text

**Primer and Probes Sequences for Chromosome Quantification (Fig. 2A).** *Mutant Itga6*: probe: TGGATCCCCCGGGCTGCA; forward primer: GAAACTGTAAAATTGACT AAATACCTTGCT; reverse primer: AGGGTTATTGAATATGATCGGAATTC. *Wild-type Itga6*: probe: CAAGGCTGAGATCCATACTCAGCCGTCTG; forward primer: AAAGATCATTACGATGCCACCTATC; reverse primer: GCTAGCGATGAAAAACATTGATCA. *Hoxa13*: probe: CAGCTGGTCCAGCACCTCCCC; forward primer: TTACAGAAACAAAGGCTGTTTCCA; reverse primer: TGAGCAG-GCACTTAACATGCA.

**PCR Detection of DNA Inversion in Photoreceptors (Fig. 3B).** Primer A: GTACGTCTTCCCGAGCGAAA. Primer B: CCCTGTGGCT-GATCCTTG; Primer C: AGCTAGGGTGTACTGAGAATT-TGG; Primer D: GTCATCGCTCTCCACACTCA.

**Real-Time PCR Quantification of DNA Inversion (Fig. 3B)** Primer 1: GCTACATCGACATGGTGTCCACTT; Primer 2: GTTGCTC-CTACCTGGAAAGGATGA; Primer 3: TGTCCTTCTAC-CAGGGCTACACAA; Primer 4: TGTGCTGCAAGGCGATTA-AGTTGG; Primer 5: CAGTACACCTGGCTGTTCCA; Primer 6: CAAACAAACAGTATGATCCCAGA.
